# Supplementary material
Source: MDPI journal article supplement (https://www.mdpi.com/1424-8247/16/9/1226)
Supplement: s1 [file s1]

# Hot Melt Extrusion for Improving the Physicochemical Properties of Polydatin Derived from *Polygoni cuspidati* Extract; A Solution Recommended for Buccal Applications

## Supplementary material

**Table S1.** Mathematical models of release profiles of formulations F1-F4.

| Formulation No. | Compression pressure | Mathematical model |                |                     |                |                 |                |                          |             |
|-----------------|----------------------|--------------------|----------------|---------------------|----------------|-----------------|----------------|--------------------------|-------------|
|                 |                      | Zero-order kinetic |                | First-order kinetic |                | Higuchi kinetic |                | Korsmeyer-Peppas kinetic |             |
|                 |                      | K                  | R <sup>2</sup> | K                   | R <sup>2</sup> | K               | R <sup>2</sup> | R <sup>2</sup>           | n           |
| F1              | 1000N                | <b>18.04</b>       | <b>0.92</b>    | 0.67                | 0.60           | 18.86           | 0.87           | <b>0.95</b>              | <b>0.64</b> |
|                 | 1500N                | <b>17.13</b>       | <b>0.96</b>    | 0.55                | 0.62           | 12.90           | 0.87           | <b>0.95</b>              | <b>0.62</b> |
|                 | 2000N                | <b>17.44</b>       | <b>0.96</b>    | 0.58                | 0.63           | 13.06           | 0.86           | <b>0.96</b>              | <b>0.63</b> |
| F2              | 1000N                | <b>16.85</b>       | <b>0.99</b>    | 0.68                | 0.76           | 11.33           | 0.75           | 0.98                     | 0.64        |
|                 | 1500N                | <b>15.21</b>       | <b>0.99</b>    | 0.69                | 0.77           | 10.17           | 0.74           | 0.97                     | 0.64        |
|                 | 2000N                | <b>13.86</b>       | <b>0.99</b>    | 0.65                | 0.80           | 9.21            | 0.73           | 0.97                     | 0.60        |
| F3              | 1500N                | <b>3.86</b>        | <b>0.90</b>    | 0.52                | 0.69           | 2.99            | 0.88           | <b>0.90</b>              | <b>0.48</b> |
|                 | 2000N                | <b>3.56</b>        | <b>0.91</b>    | 0.51                | 0.70           | 2.76            | 0.88           | <b>0.90</b>              | <b>0.46</b> |
|                 | 2500N                | <b>3.41</b>        | <b>0.94</b>    | 0.51                | 0.75           | 2.55            | 0.86           | <b>0.91</b>              | <b>0.45</b> |
| F4              | 1500N                | <b>5.77</b>        | <b>0.98</b>    | 0.59                | 0.78           | 4.12            | 0.82           | 0.93                     | 0.52        |
|                 | 2000N                | <b>5.28</b>        | <b>0.99</b>    | 0.57                | 0.68           | 3.79            | 0.83           | 0.88                     | 0.52        |
|                 | 2500N                | <b>5.22</b>        | <b>0.99</b>    | 0.56                | 0.76           | 3.72            | 0.82           | 0.93                     | 0.49        |

the most fitting mathematical model is shown in bold.

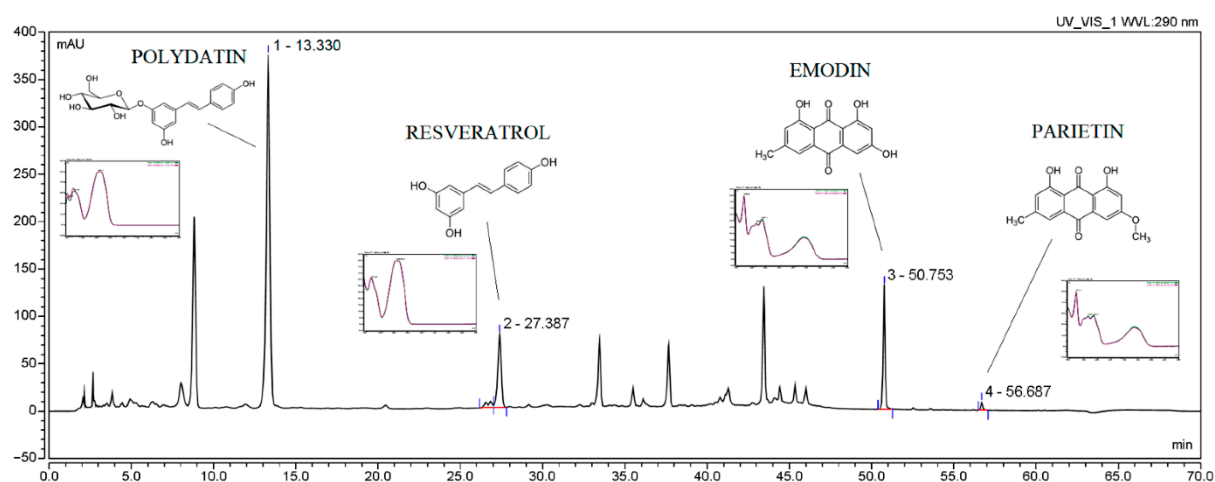

**Figure S1.** Chromatogram of *Polygoni cuspidati* extract.
